CORRECTION

# Correction: Impacts of Surface Water Diversions for Marijuana Cultivation on Aquatic Habitat in Four Northwestern California Watersheds

Scott Bauer, Jennifer Olson, Adam Cockrill, Michael van Hattem, Linda Miller, Margaret Tauzer, Gordon Leppig

There are errors in the equations in the In the Hydrologic Analyses: Estimating Impacts on Summer Low Flows subsection of the Methods. These errors do not affect the results presented in the paper. Please view the complete, correct equation here:

$$Q_{Avg} = 0.000317 \times R \times A \quad \text{Eq 1}$$

with

$$R = MAP - 0.4 (PET) - 23.11 \quad \text{Eq 2}$$

where

$$Q_{Avg} = \text{mean annual discharge} \left( \frac{m^3}{sec} \right)$$

$$R = \text{mean annual runoff} \left( \frac{cm}{yr} \right)$$

$$A = \text{drainage area} (km^2)$$

$$MAP = \text{mean annual precipitation} \left( \frac{cm}{yr} \right)$$

$$PET = \text{potential evapotranspiration} \left( \frac{cm}{yr} \right)$$

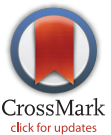

**OPEN ACCESS**

**Citation:** Bauer S, Olson J, Cockrill A, van Hattem M, Miller L, Tauzer M, et al. (2015) Correction: Impacts of Surface Water Diversions for Marijuana Cultivation on Aquatic Habitat in Four Northwestern California Watersheds. PLoS ONE 10(9): e0137935. doi:10.1371/journal.pone.0137935

**Published:** September 3, 2015

**Copyright:** © 2015 Bauer et al. This is an open access article distributed under the terms of the [Creative Commons Attribution License](https://creativecommons.org/licenses/by/4.0/), which permits unrestricted use, distribution, and reproduction in any medium, provided the original author and source are credited.

**Reference**

1. Bauer S, Olson J, Cockrill A, van Hattem M, Miller L, Tauzer M, et al. (2015) Impacts of Surface Water Diversions for Marijuana Cultivation on Aquatic Habitat in Four Northwestern California Watersheds. PLoS ONE 10(3): e0120016. doi:10.1371/journal.pone.0120016 PMID: 25785849
